# Supplementary material for: Living Organisms Author Their Read-Write Genomes in Evolution
Source: Biology (Basel). 2017 Dec 6;6(4):42. doi: 10.3390/biology6040042 (PMC5745447; doi:10.3390/biology6040042)
Supplement: Supplementary file 1 [file biology-06-00042-s001.tgz]

Archive with 48 entries (41 files):
- biology-224185-supplementary & PUBMED links/
- biology-224185-supplementary & PUBMED links/.DS_Store
- __MACOSX/
- __MACOSX/biology-224185-supplementary & PUBMED links/
- __MACOSX/biology-224185-supplementary & PUBMED links/._.DS_Store
- biology-224185-supplementary & PUBMED links/biology-224185.zip/
- biology-224185-supplementary & PUBMED links/biology-224185.zip/.DS_Store
- __MACOSX/biology-224185-supplementary & PUBMED links/biology-224185.zip/
- __MACOSX/biology-224185-supplementary & PUBMED links/biology-224185.zip/._.DS_Store
- biology-224185-supplementary & PUBMED links/biology-224185.zip/Shapiro - Living Organisms Author Their Read-Write Genomes in Evolution - Supplemental Material.Renumbered and Approved + PUBMED links/
- biology-224185-supplementary & PUBMED links/biology-224185.zip/Shapiro - Living Organisms Author Their Read-Write Genomes in Evolution - Supplemental Material.Renumbered and Approved + PUBMED links/.DS_Store
- __MACOSX/biology-224185-supplementary & PUBMED links/biology-224185.zip/Shapiro - Living Organisms Author Their Read-Write Genomes in Evolution - Supplemental Material.Renumbered and Approved + PUBMED links/
- __MACOSX/biology-224185-supplementary & PUBMED links/biology-224185.zip/Shapiro - Living Organisms Author Their Read-Write Genomes in Evolution - Supplemental Material.Renumbered and Approved + PUBMED links/._.DS_Store
- biology-224185-supplementary & PUBMED links/biology-224185.zip/Shapiro - Living Organisms Author Their Read-Write Genomes in Evolution - Supplemental Material.Renumbered and Approved + PUBMED links/Additional References for Living Organisms Author Their Read.docx
- __MACOSX/biology-224185-supplementary & PUBMED links/biology-224185.zip/Shapiro - Living Organisms Author Their Read-Write Genomes in Evolution - Supplemental Material.Renumbered and Approved + PUBMED links/._Additional References for Living Organisms Author Their Read.docx
- biology-224185-supplementary & PUBMED links/biology-224185.zip/Shapiro - Living Organisms Author Their Read-Write Genomes in Evolution - Supplemental Material.Renumbered and Approved + PUBMED links/Supplementary Table S1 Key Scientists Advocating non.docx
- __MACOSX/biology-224185-supplementary & PUBMED links/biology-224185.zip/Shapiro - Living Organisms Author Their Read-Write Genomes in Evolution - Supplemental Material.Renumbered and Approved + PUBMED links/._Supplementary Table S1 Key Scientists Advocating non.docx
- biology-224185-supplementary & PUBMED links/biology-224185.zip/Shapiro - Living Organisms Author Their Read-Write Genomes in Evolution - Supplemental Material.Renumbered and Approved + PUBMED links/Supplementary Table S10 Some Reported Instances of Orphan Coding Sequences.docx
- __MACOSX/biology-224185-supplementary & PUBMED links/biology-224185.zip/Shapiro - Living Organisms Author Their Read-Write Genomes in Evolution - Supplemental Material.Renumbered and Approved + PUBMED links/._Supplementary Table S10 Some Reported Instances of Orphan Coding Sequences.docx
- biology-224185-supplementary & PUBMED links/biology-224185.zip/Shapiro - Living Organisms Author Their Read-Write Genomes in Evolution - Supplemental Material.Renumbered and Approved + PUBMED links/Supplementary Table S11 Origination of Novel Exons from Mobile DNA Elements.docx
- __MACOSX/biology-224185-supplementary & PUBMED links/biology-224185.zip/Shapiro - Living Organisms Author Their Read-Write Genomes in Evolution - Supplemental Material.Renumbered and Approved + PUBMED links/._Supplementary Table S11 Origination of Novel Exons from Mobile DNA Elements.docx
- biology-224185-supplementary & PUBMED links/biology-224185.zip/Shapiro - Living Organisms Author Their Read-Write Genomes in Evolution - Supplemental Material.Renumbered and Approved + PUBMED links/Supplementary Table S13 Distributed genome network innovation attributed to mobile DNA elements.docx
- __MACOSX/biology-224185-supplementary & PUBMED links/biology-224185.zip/Shapiro - Living Organisms Author Their Read-Write Genomes in Evolution - Supplemental Material.Renumbered and Approved + PUBMED links/._Supplementary Table S13 Distributed genome network innovation attributed to mobile DNA elements.docx
- biology-224185-supplementary & PUBMED links/biology-224185.zip/Shapiro - Living Organisms Author Their Read-Write Genomes in Evolution - Supplemental Material.Renumbered and Approved + PUBMED links/Supplementary Table S14 Diverse Regulatory Functions Reported for Long Non.docx
- __MACOSX/biology-224185-supplementary & PUBMED links/biology-224185.zip/Shapiro - Living Organisms Author Their Read-Write Genomes in Evolution - Supplemental Material.Renumbered and Approved + PUBMED links/._Supplementary Table S14 Diverse Regulatory Functions Reported for Long Non.docx
- biology-224185-supplementary & PUBMED links/biology-224185.zip/Shapiro - Living Organisms Author Their Read-Write Genomes in Evolution - Supplemental Material.Renumbered and Approved + PUBMED links/Supplementary Table S15 Diverse Mutagenic Natural Genetic Engineering Activities.docx
- __MACOSX/biology-224185-supplementary & PUBMED links/biology-224185.zip/Shapiro - Living Organisms Author Their Read-Write Genomes in Evolution - Supplemental Material.Renumbered and Approved + PUBMED links/._Supplementary Table S15 Diverse Mutagenic Natural Genetic Engineering Activities.docx
- biology-224185-supplementary & PUBMED links/biology-224185.zip/Shapiro - Living Organisms Author Their Read-Write Genomes in Evolution - Supplemental Material.Renumbered and Approved + PUBMED links/Supplementary Table S16 Ecological Factors that Stimulate Natural Genetic Engineering.docx
- __MACOSX/biology-224185-supplementary & PUBMED links/biology-224185.zip/Shapiro - Living Organisms Author Their Read-Write Genomes in Evolution - Supplemental Material.Renumbered and Approved + PUBMED links/._Supplementary Table S16 Ecological Factors that Stimulate Natural Genetic Engineering.docx
- biology-224185-supplementary & PUBMED links/biology-224185.zip/Shapiro - Living Organisms Author Their Read-Write Genomes in Evolution - Supplemental Material.Renumbered and Approved + PUBMED links/Supplementary Table S17 Different Genome Changes Observed in Cancer Cells http.docx
- __MACOSX/biology-224185-supplementary & PUBMED links/biology-224185.zip/Shapiro - Living Organisms Author Their Read-Write Genomes in Evolution - Supplemental Material.Renumbered and Approved + PUBMED links/._Supplementary Table S17 Different Genome Changes Observed in Cancer Cells http.docx
- biology-224185-supplementary & PUBMED links/biology-224185.zip/Shapiro - Living Organisms Author Their Read-Write Genomes in Evolution - Supplemental Material.Renumbered and Approved + PUBMED links/Supplementary Table S3 Photosynthetic eukaryotic lineages resulting from symbiogenesis.docx
- __MACOSX/biology-224185-supplementary & PUBMED links/biology-224185.zip/Shapiro - Living Organisms Author Their Read-Write Genomes in Evolution - Supplemental Material.Renumbered and Approved + PUBMED links/._Supplementary Table S3 Photosynthetic eukaryotic lineages resulting from symbiogenesis.docx
- biology-224185-supplementary & PUBMED links/biology-224185.zip/Shapiro - Living Organisms Author Their Read-Write Genomes in Evolution - Supplemental Material.Renumbered and Approved + PUBMED links/Supplementary Table S4 Selected Examples of Speciation and Adaptive Radiation.docx
- __MACOSX/biology-224185-supplementary & PUBMED links/biology-224185.zip/Shapiro - Living Organisms Author Their Read-Write Genomes in Evolution - Supplemental Material.Renumbered and Approved + PUBMED links/._Supplementary Table S4 Selected Examples of Speciation and Adaptive Radiation.docx
- biology-224185-supplementary & PUBMED links/biology-224185.zip/Shapiro - Living Organisms Author Their Read-Write Genomes in Evolution - Supplemental Material.Renumbered and Approved + PUBMED links/Supplementary Table S5 Genomic consequences of experimental interspecific hybridization in plants and animals.docx
- __MACOSX/biology-224185-supplementary & PUBMED links/biology-224185.zip/Shapiro - Living Organisms Author Their Read-Write Genomes in Evolution - Supplemental Material.Renumbered and Approved + PUBMED links/._Supplementary Table S5 Genomic consequences of experimental interspecific hybridization in plants and animals.docx
- biology-224185-supplementary & PUBMED links/biology-224185.zip/Shapiro - Living Organisms Author Their Read-Write Genomes in Evolution - Supplemental Material.Renumbered and Approved + PUBMED links/Supplementary Table S6 Modes of Horizontal DNA Transfer.docx
- __MACOSX/biology-224185-supplementary & PUBMED links/biology-224185.zip/Shapiro - Living Organisms Author Their Read-Write Genomes in Evolution - Supplemental Material.Renumbered and Approved + PUBMED links/._Supplementary Table S6 Modes of Horizontal DNA Transfer.docx
- biology-224185-supplementary & PUBMED links/biology-224185.zip/Shapiro - Living Organisms Author Their Read-Write Genomes in Evolution - Supplemental Material.Renumbered and Approved + PUBMED links/Supplementary Table S7 Selected examples of inter.docx
- __MACOSX/biology-224185-supplementary & PUBMED links/biology-224185.zip/Shapiro - Living Organisms Author Their Read-Write Genomes in Evolution - Supplemental Material.Renumbered and Approved + PUBMED links/._Supplementary Table S7 Selected examples of inter.docx
- biology-224185-supplementary & PUBMED links/biology-224185.zip/Shapiro - Living Organisms Author Their Read-Write Genomes in Evolution - Supplemental Material.Renumbered and Approved + PUBMED links/Supplementary Table S8 Highly cited protein domain search terms in the PubMed database.docx
- __MACOSX/biology-224185-supplementary & PUBMED links/biology-224185.zip/Shapiro - Living Organisms Author Their Read-Write Genomes in Evolution - Supplemental Material.Renumbered and Approved + PUBMED links/._Supplementary Table S8 Highly cited protein domain search terms in the PubMed database.docx
- biology-224185-supplementary & PUBMED links/biology-224185.zip/Shapiro - Living Organisms Author Their Read-Write Genomes in Evolution - Supplemental Material.Renumbered and Approved + PUBMED links/Supplementary Table S9 Selected Reports of Exon Rearrangements and Retroposition.docx
- __MACOSX/biology-224185-supplementary & PUBMED links/biology-224185.zip/Shapiro - Living Organisms Author Their Read-Write Genomes in Evolution - Supplemental Material.Renumbered and Approved + PUBMED links/._Supplementary Table S9 Selected Reports of Exon Rearrangements and Retroposition.docx
- __MACOSX/biology-224185-supplementary & PUBMED links/biology-224185.zip/._Shapiro - Living Organisms Author Their Read-Write Genomes in Evolution - Supplemental Material.Renumbered and Approved + PUBMED links
- __MACOSX/biology-224185-supplementary & PUBMED links/._biology-224185.zip
- __MACOSX/._biology-224185-supplementary & PUBMED links
